# Supplementary material for: Very slow surfactant adsorption at the solid–liquid interface is due to long lived surface aggregates
Source: Royal Society of Chemistry journal article supplement (doi:10.1039/b903768c), 2009-01-01
Supplement: b903768c.pdf [file b903768c.pdf]

## Supporting materials

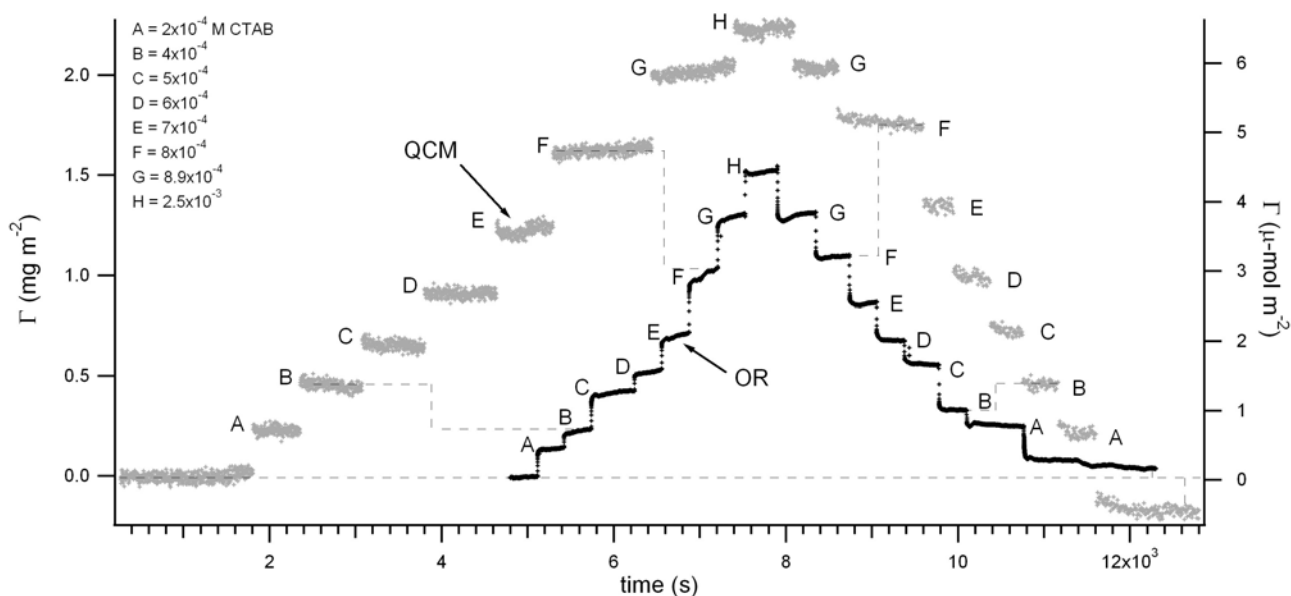

Figure S1: This is the same as figure 11 however the QCM data has not been corrected for baseline drift. It shows concentration stepping experiments in both the OR and the QCM using CTAB in the absence of electrolyte. The same solutions were used for both instruments. Note that injection spikes were removed from QCM data and baseline drift of approximately  $-0.1 \text{ mg m}^{-2}$  was corrected.

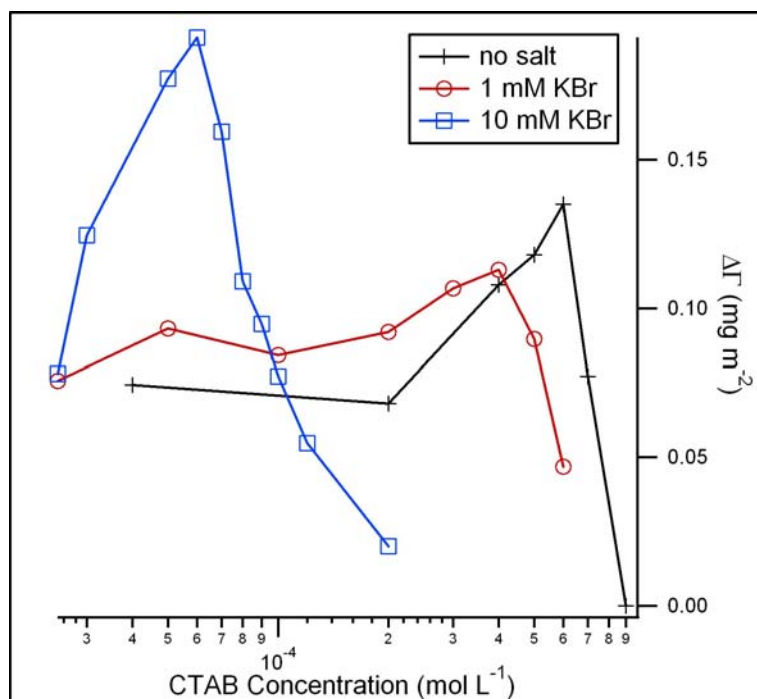

Figure S2. Difference in surface excess between the decreasing and increasing concentration portions of the ziggurat plots in figures 8, 9 and 10. Each set of data shows a maximum in the increasing region of the adsorption isotherm.
